# Supplementary material for: Prediction of Acid-Base and Potassium Imbalances in Intensive Care Patients Using Machine Learning Techniques
Source: MDPI journal article supplement (doi:10.3390/diagnostics13061171), 2023-03-18
Supplement: s1 [file s1]

## **Supplementary Materials**

Prediction of Acid–Base and Potassium Imbalances in  
Intensive Care Patients using Machine Learning Techniques

Ratchakit Phetrattikun, Kerdkiat Suvirat, Kanakorn Horsiritham,  
Thammasin Ingviya, and Sitthichok Chaichulee

Table S1: Summary of the functions in the scikit-learn library and the hyperparameters that are optimized during the training of an algorithm.

| <b>Algorithm</b>       | <b>Function in scikit-learn</b>   | <b>Optimising hyperparameter</b>                                                             |
|------------------------|-----------------------------------|----------------------------------------------------------------------------------------------|
| K Nearest Neighbours   | <b>KNeighborsClassifier</b>       | Number of neighbors : {3, 5, 7, 9}<br>Weight function: {'uniform','distance'}                |
| Support Vector Machine | <b>SVC</b>                        | Kernel function: {'radial basis function', 'polynomial'}<br>C parameters: {1, 10, 100, 1000} |
| Random Forests         | <b>RandomForestClassifier</b>     | Number of trees: {200, 400, 600}<br>Maximum depth of the tree: {4, 8, 12, 16}                |
| Gradient Boosting      | <b>GradientBoostingClassifier</b> | Number of trees: {100, 250, 400}<br>Maximum depth of the tree: {4, 8, 12}                    |

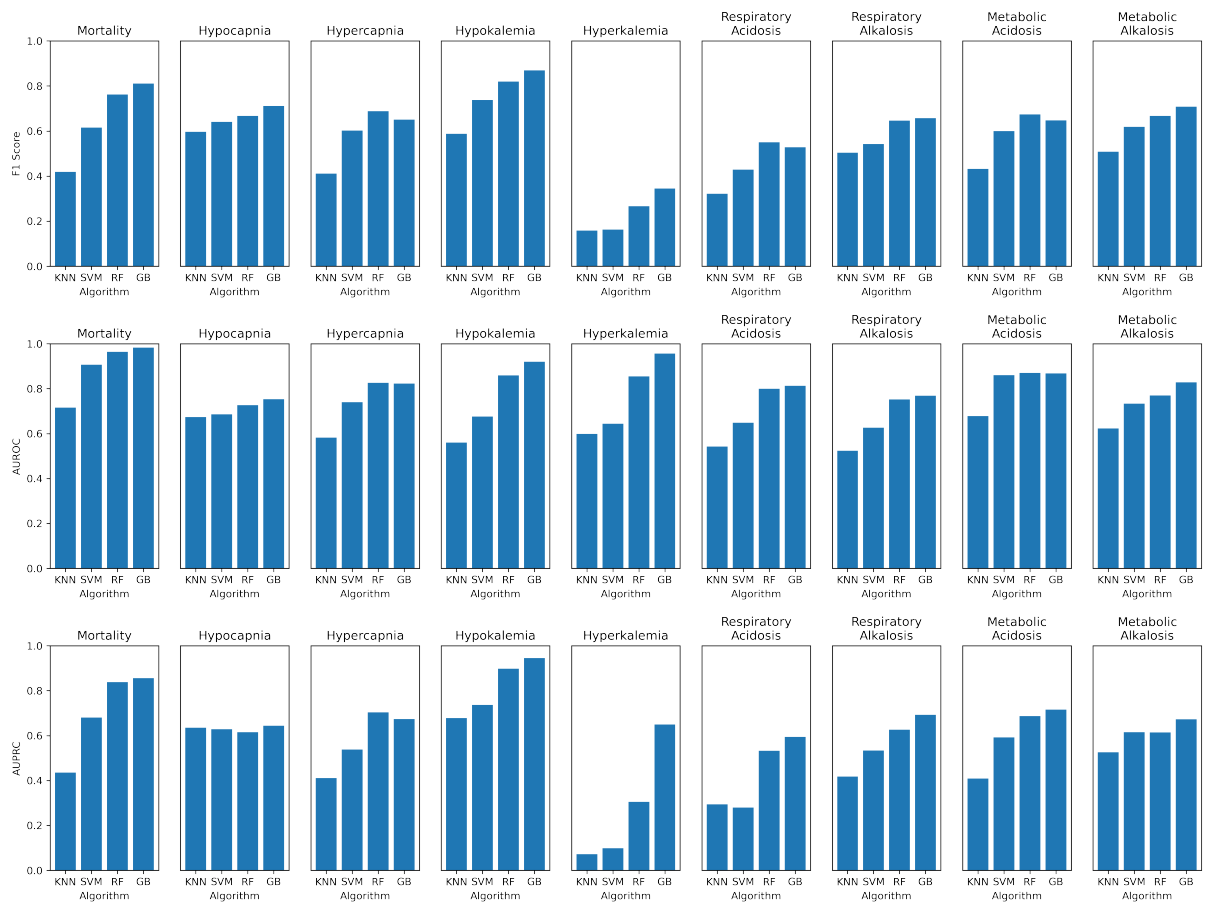

Figure S1: Visualization of F1 score, AUROC, and AUPRC for each algorithm and for each clinical condition. The data are taken from Table 3

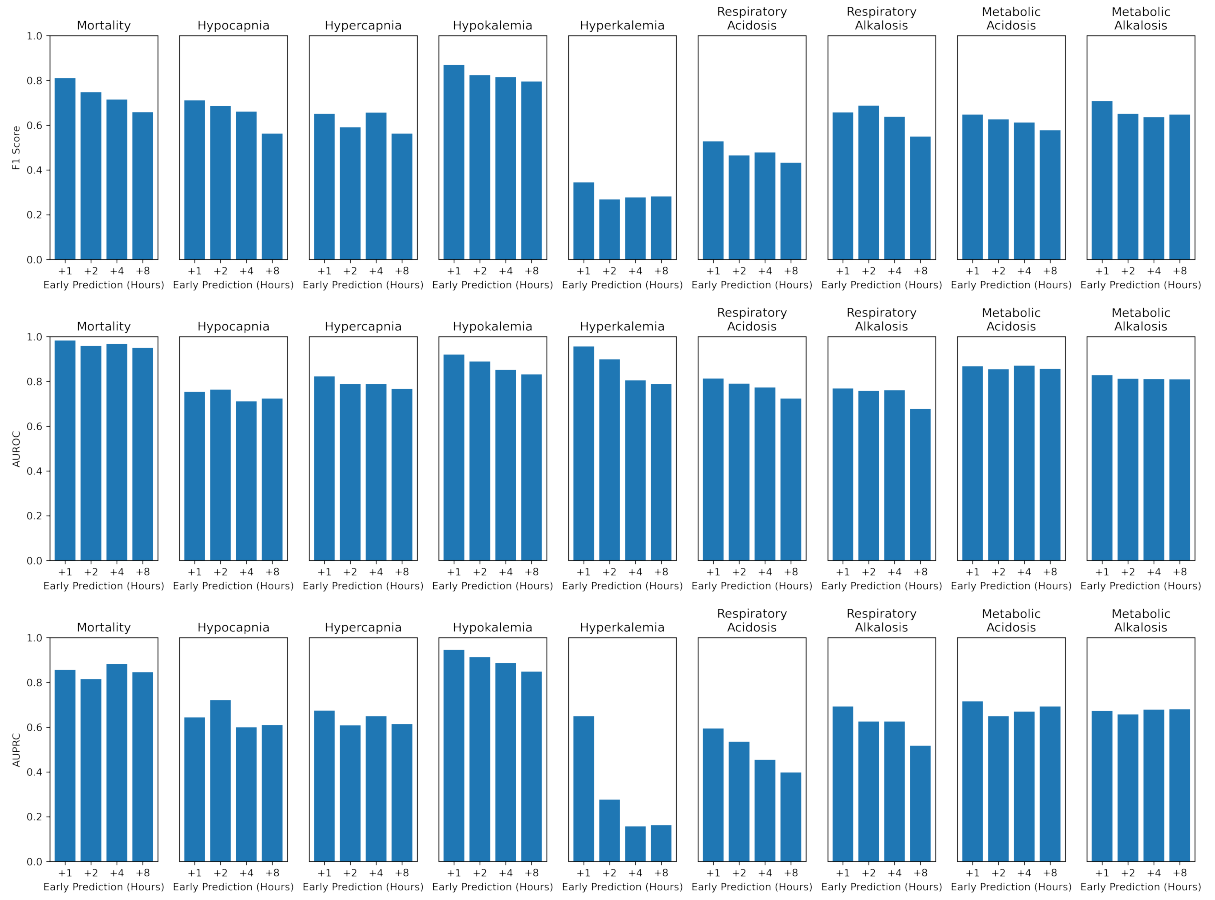

Figure S2: Visualization of F1 score, AUROC, and AUPRC for each early prediction window ( $\{1, 2, 4, 8\}$ ) and for each clinical condition. The data are taken from Table 3

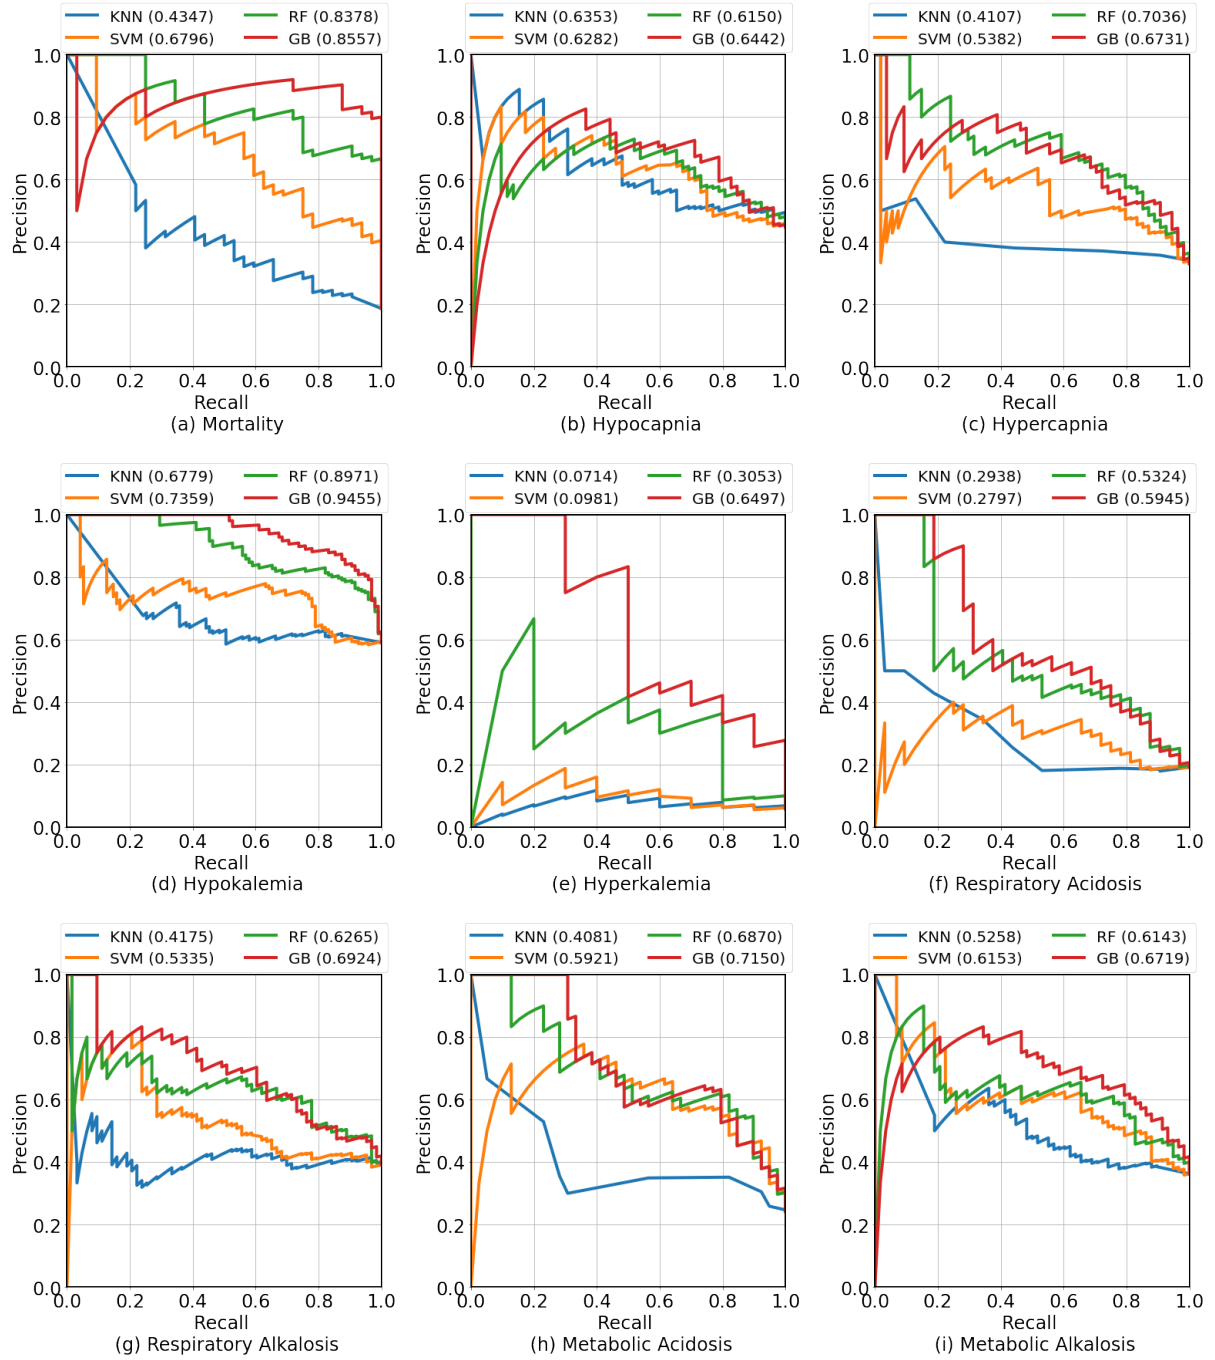

Figure S3: PR curves compare different algorithms for each clinical condition: (a) mortality, (b) hypocapnia, (c) hypercapnia, (d) hypokalemia, (e) hyperkalemia, (f) respiratory acidosis, (g) respiratory alkalosis, (h) metabolic acidosis, and (i) metabolic alkalosis.

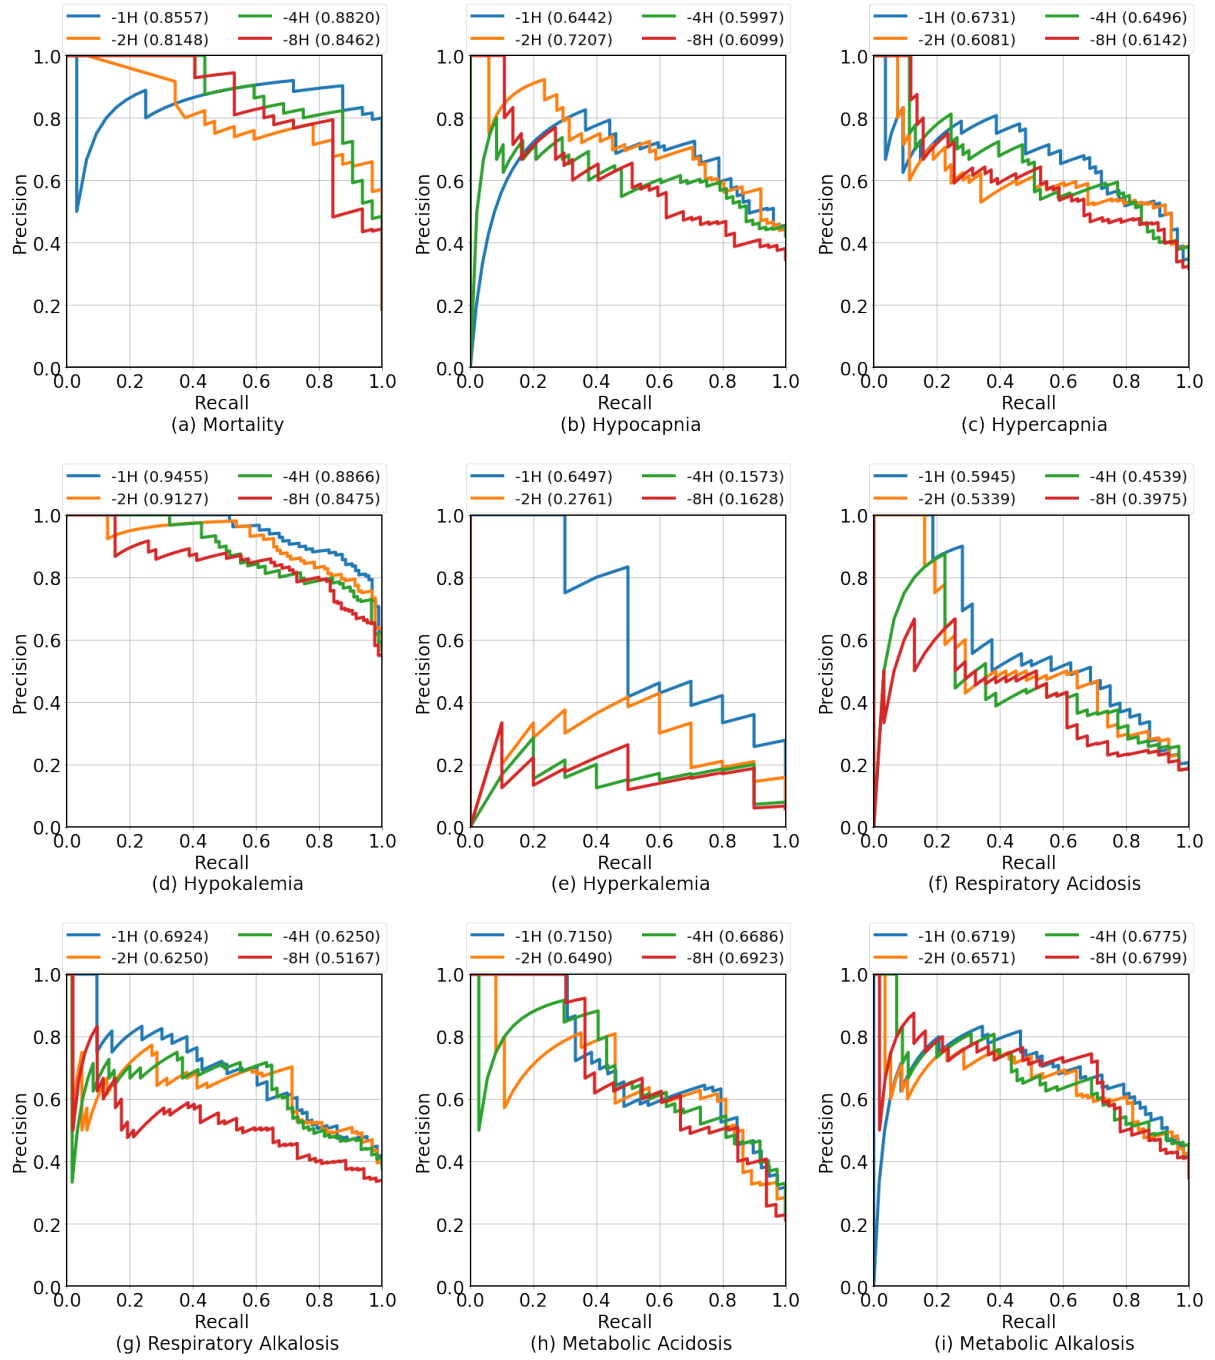

Figure S4: PR curves compare different early prediction windows for each clinical condition: (a) mortality, (b) hypocapnia, (c) hypercapnia, (d) hypokalemia, (e) hyperkalemia, (f) respiratory acidosis, (g) respiratory alkalosis, (h) metabolic acidosis, and (i) metabolic alkalosis.

| (a) Mortality |          |                  |          |
|---------------|----------|------------------|----------|
| Prediction    |          | Actual condition |          |
|               |          | Negative         | Positive |
|               | Negative | 124              | 0        |
|               | Positive | 15               | 32       |

| (b) Hypocapnia |          |                  |          |
|----------------|----------|------------------|----------|
| Prediction     |          | Actual condition |          |
|                |          | Negative         | Positive |
|                | Negative | 49               | 15       |
|                | Positive | 15               | 37       |

| (c) Hypercapnia |          |                  |          |
|-----------------|----------|------------------|----------|
| Prediction      |          | Actual condition |          |
|                 |          | Negative         | Positive |
|                 | Negative | 82               | 15       |
|                 | Positive | 27               | 39       |

|  |  |  |  |

| (d) Hypokalemia |          |                  |          |
|-----------------|----------|------------------|----------|
| Prediction      |          | Actual condition |          |
|                 |          | Negative         | Positive |
|                 | Negative | 53               | 12       |
|                 | Positive | 13               | 83       |

| (e) Hyperkalemia |          |                  |          |
|------------------|----------|------------------|----------|
| Prediction       |          | Actual condition |          |
|                  |          | Negative         | Positive |
|                  | Negative | 123              | 0        |
|                  | Positive | 38               | 10       |

| (f) Respiratory Acidosis |          |                  |          |
|--------------------------|----------|------------------|----------|
| Prediction               |          | Actual condition |          |
|                          |          | Negative         | Positive |
|                          | Negative | 100              | 8        |
|                          | Positive | 35               | 24       |

|  |  |  |  |

| (g) Respiratory Alkalosis |          |                  |          |
|---------------------------|----------|------------------|----------|
| Prediction                |          | Actual condition |          |
|                           |          | Negative         | Positive |
|                           | Negative | 69               | 18       |
|                           | Positive | 29               | 45       |

| (h) Metabolic Acidosis |          |                  |          |
|------------------------|----------|------------------|----------|
| Prediction             |          | Actual condition |          |
|                        |          | Negative         | Positive |
|                        | Negative | 94               | 7        |
|                        | Positive | 28               | 32       |

| (i) Metabolic Alkalosis |          |                  |          |
|-------------------------|----------|------------------|----------|
| Prediction              |          | Actual condition |          |
|                         |          | Negative         | Positive |
|                         | Negative | 76               | 12       |
|                         | Positive | 26               | 46       |

Figure S5: Confusion matrices of GB classifiers on the test set for a one hour early prediction window for each clinical condition: (a) mortality, (b) hypocapnia, (c) hypercapnia, (d) hypokalemia, (e) hyperkalemia, (f) respiratory acidosis, (g) respiratory alkalosis, (h) metabolic acidosis, and (i) metabolic alkalosis.
